# Supplementary material for: Transcription and splicing regulation by NLRC5 shape the interferon response in human pancreatic β cells
Source: PubMed Central journal article supplement — Sci Adv. 2022 Sep 14;8(37):eabn5732. doi: 10.1126/sciadv.abn5732 (PMC9473574; doi:10.1126/sciadv.abn5732), 2022-09-14
Supplement: sciadv.abn5732_sm.pdf [file sciadv.abn5732_sm.pdf]

Supplementary Materials for  
**Transcription and splicing regulation by NLRC5 shape the interferon  
response in human pancreatic  $\beta$  cells**

Florian Szymczak *et al.*

Corresponding author: Décio L. Eizirik, decio.laks.eizirik@ulb.be

*Sci. Adv.* **8**, eabn5732 (2022)  
DOI: 10.1126/sciadv.abn5732

**The PDF file includes:**

Figs. S1 to S10  
Tables S1 to S4  
Legends for data S1 to S3

**Other Supplementary Material for this manuscript includes the following:**

Data S1 to S3

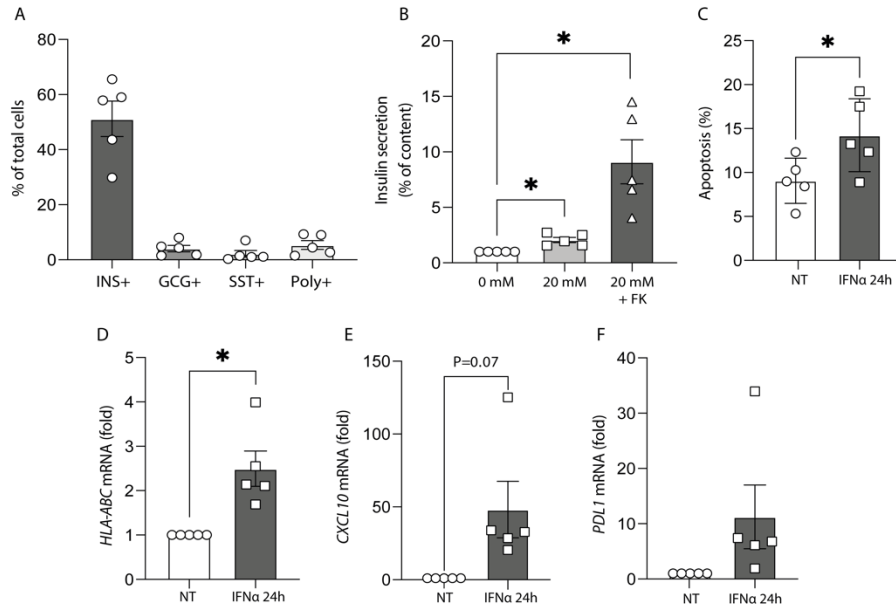

**Fig. S1. iPSCs-derived islet-like cells used for the scRNA-sequencing.** (A) Percentage of insulin (INS), glucagon (GCG), somatostatin (SST) or polyhormonal (Poly) cells per total number of cells. (B) Insulin secretion expressed as percentage of total insulin content at the end of the differentiation. (C-F) At the end of the differentiation, iPSCs-derived islet-like cells were left untreated (white bars) or treated with IFN $\alpha$  (2,000 U/mL) for 24h (gray bars). (C) The percentage of dead cells was counted after Hoechst and propidium iodine staining. Expression of (D) *HLA-ABC*, (E) *CXCL10* and (F) *PDL1* was measured at mRNA level by quantitative RT-PCR and normalized by geometric mean of *GAPDH* and  $\beta$ -*actin* and then by the non-treated (NT) condition considered as 1. Results are means  $\pm$  SEM of 5 independent experiments. \* $P < 0.05$ , as indicated by bars (ANOVA followed by Bonferroni correction for multiple comparisons or paired t-test).

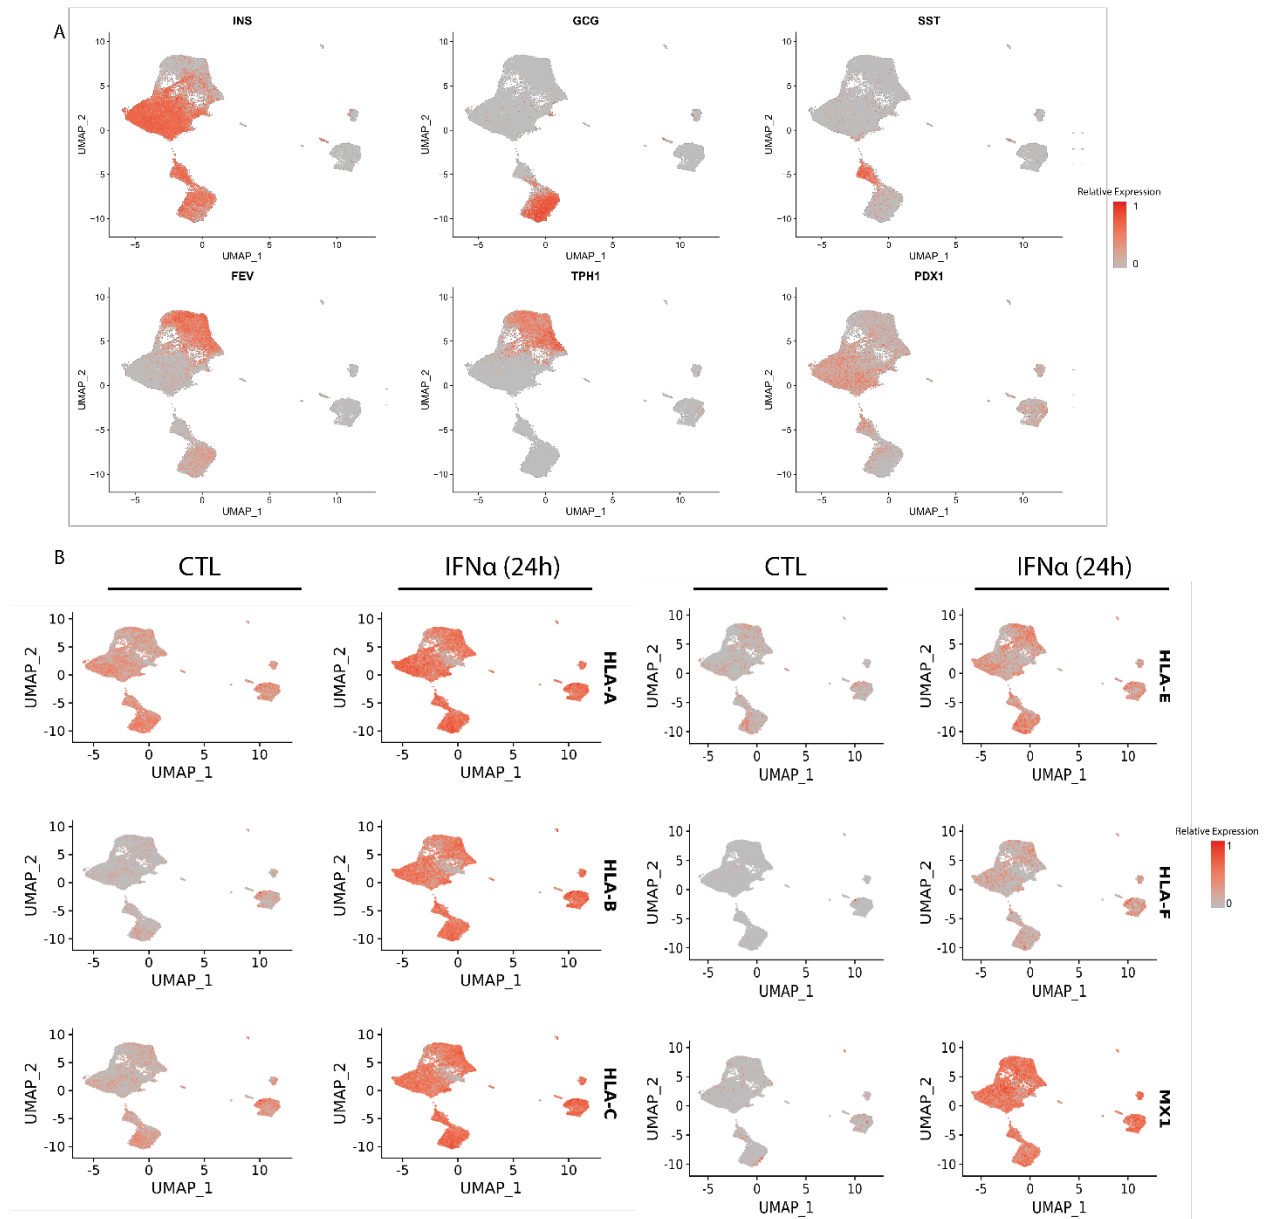

**Fig. S2. Composed plots of uniform manifold approximation and projections (UMAP).** (A) Relative expression of hallmark genes in human iPSC-derived  $\beta$ -like cells as described (30, 31). The expression of those genes is located in specific clusters. (B) Induction of HLA Class I-related genes following IFN $\alpha$  exposure is visible in all cell types of iPSC-derived islet-like cells.

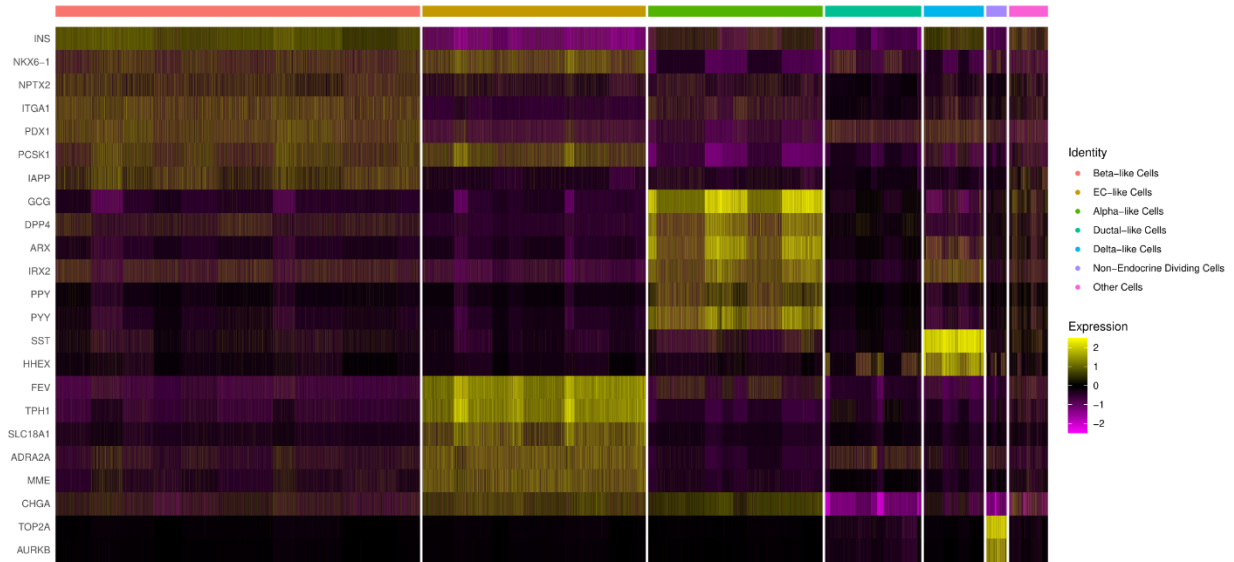

**Fig. S3. Heatmap of the hallmark genes of each cell type in the scRNA-sequencing dataset.** Gene expression matrix of the scRNA-sequencing data was scaled, and genes described in (30, 31) were used to validate the unsupervised clustering. The identified clusters were used to perform differential gene expression analysis between the paired experiments to assess the changes induced by IFN $\alpha$  in each cell type.

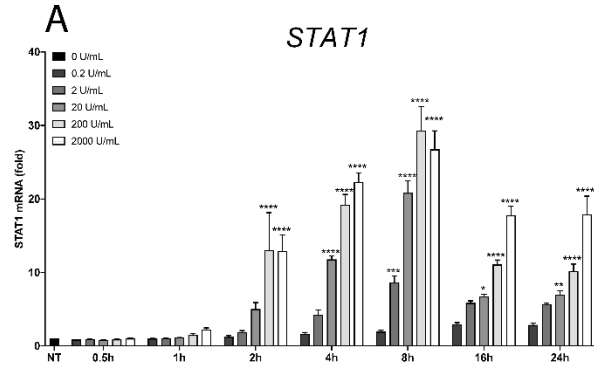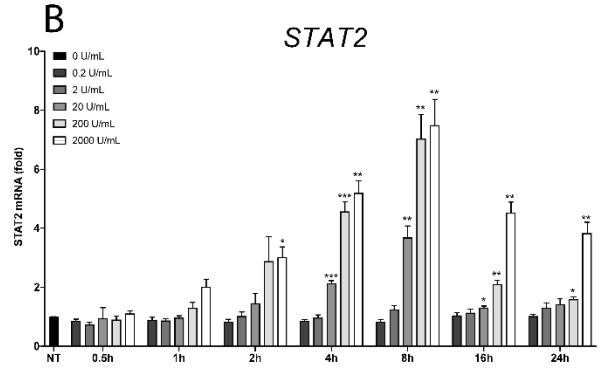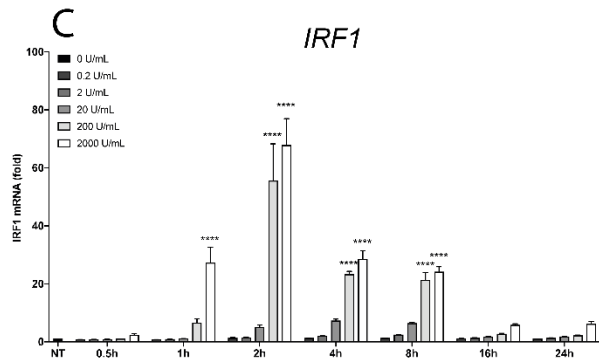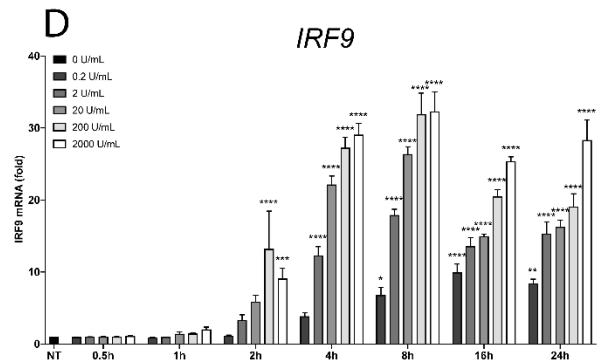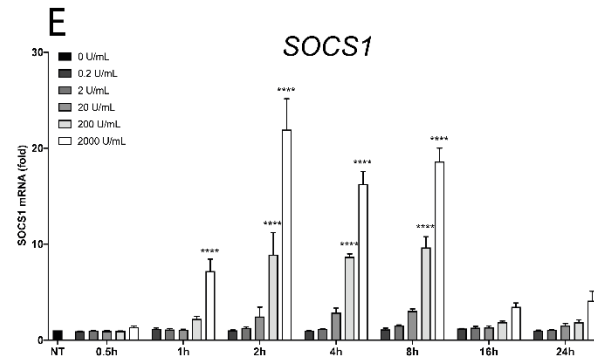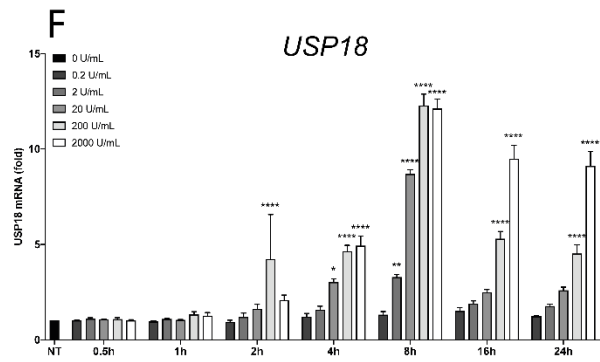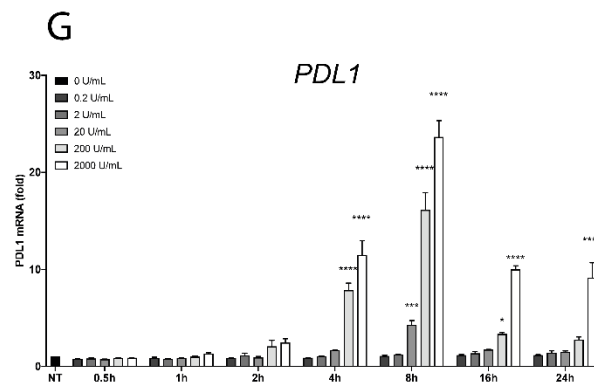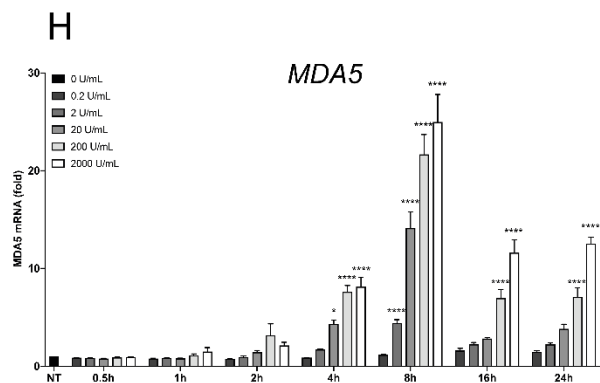

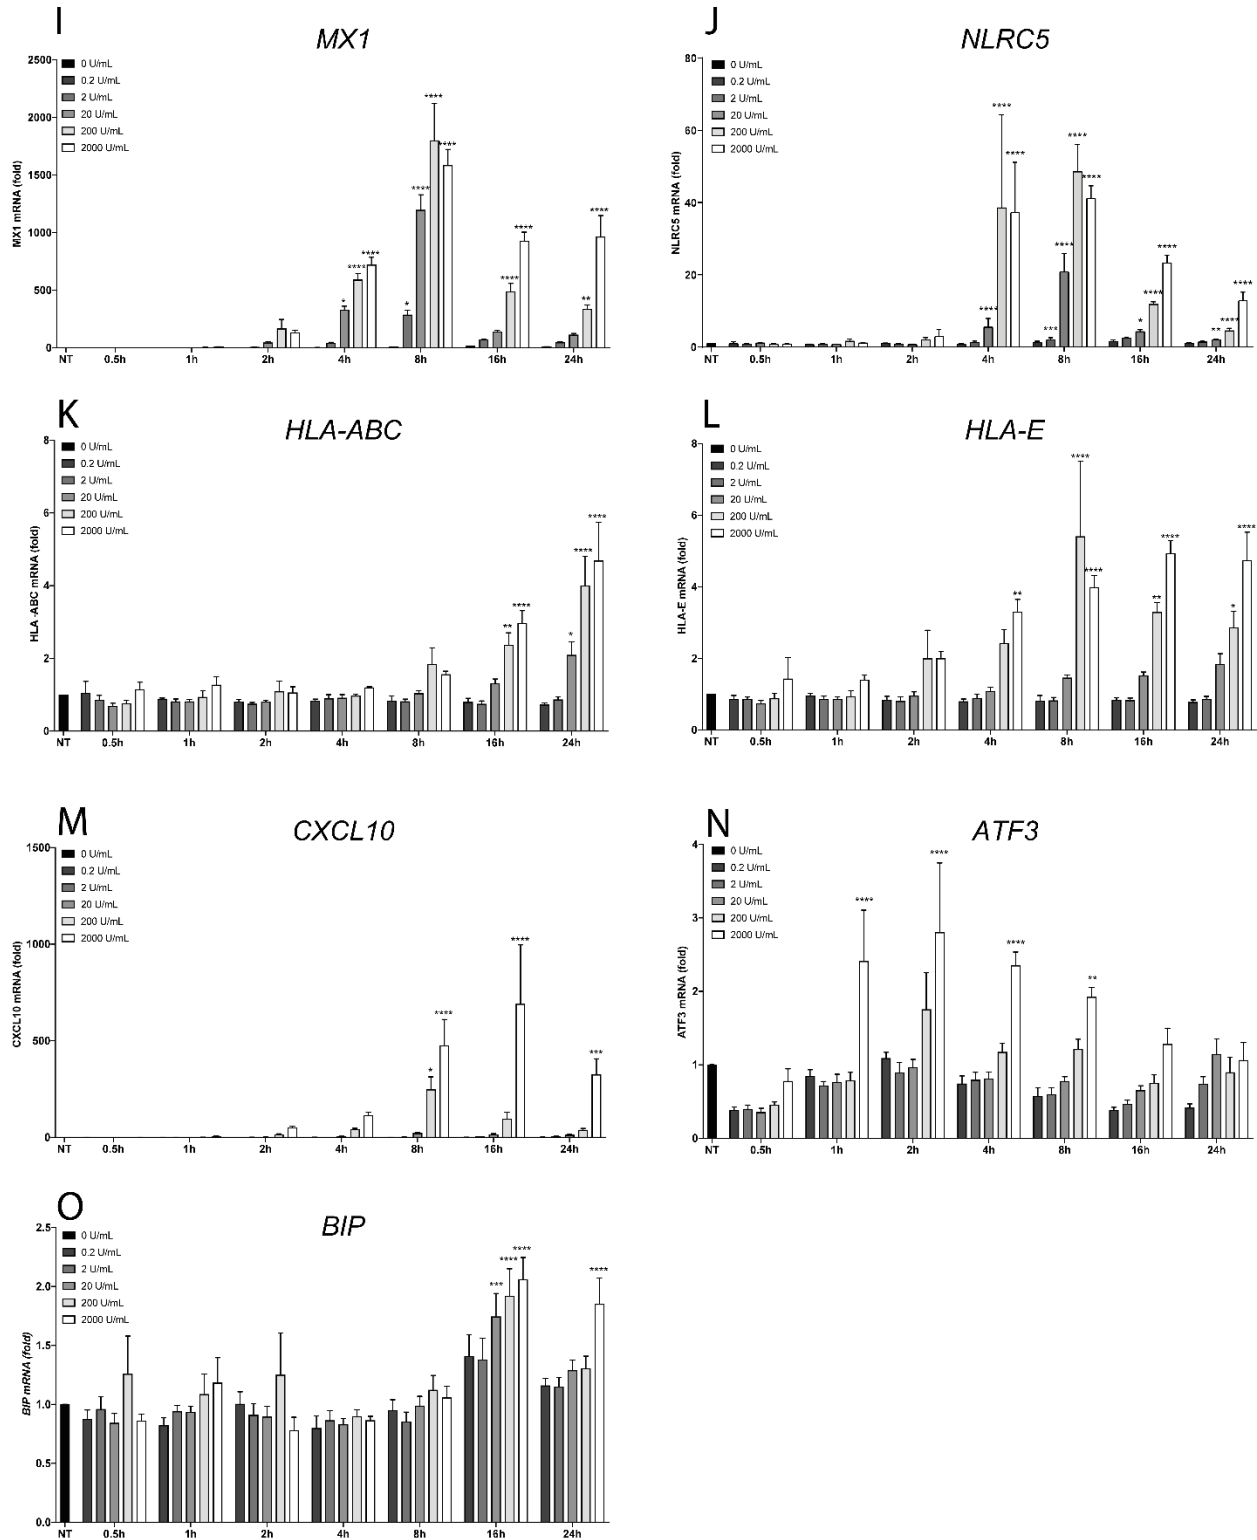

**Fig. S4. Time-course and dose-response of IFN $\alpha$ -induced expression of selected mRNAs in EndoC- $\beta$ H1 cells.** EndoC- $\beta$ H1 cells were exposed to IFN $\alpha$  for the indicated dose (0 to 2000U/mL) and time-points (0.5h to 24h). The mRNA expression of *STAT1* (A), *STAT2* (B), *IRF1* (C), *IFR9*

(D), *SOCS1* (E), *USP18* (F), *PDL1* (G), *MDA5* (H) *MX1* (I), *NLRC5* (J), *HLA-ABC* (K), *HLA-E* (L), *CXCL10* (M), *ATF3* (N) and *BiP* (G) was evaluated by quantitative RT-PCR. The values were normalized by the housekeeping gene *GAPDH* and then by the untreated (NT) conditions of each experiment considered as 1. NT is the mean of NT conditions for all time-points. Data are mean  $\pm$  SEM of 6 independent experiments, except for *NLRC5* experiments where n=3. P < 0.05, \*\* P < 0.01, \*\*\* P < 0.001, \*\*\*\* P < 0.0001 vs NT condition (ANOVA followed by Bonferroni correction for multiple comparisons).

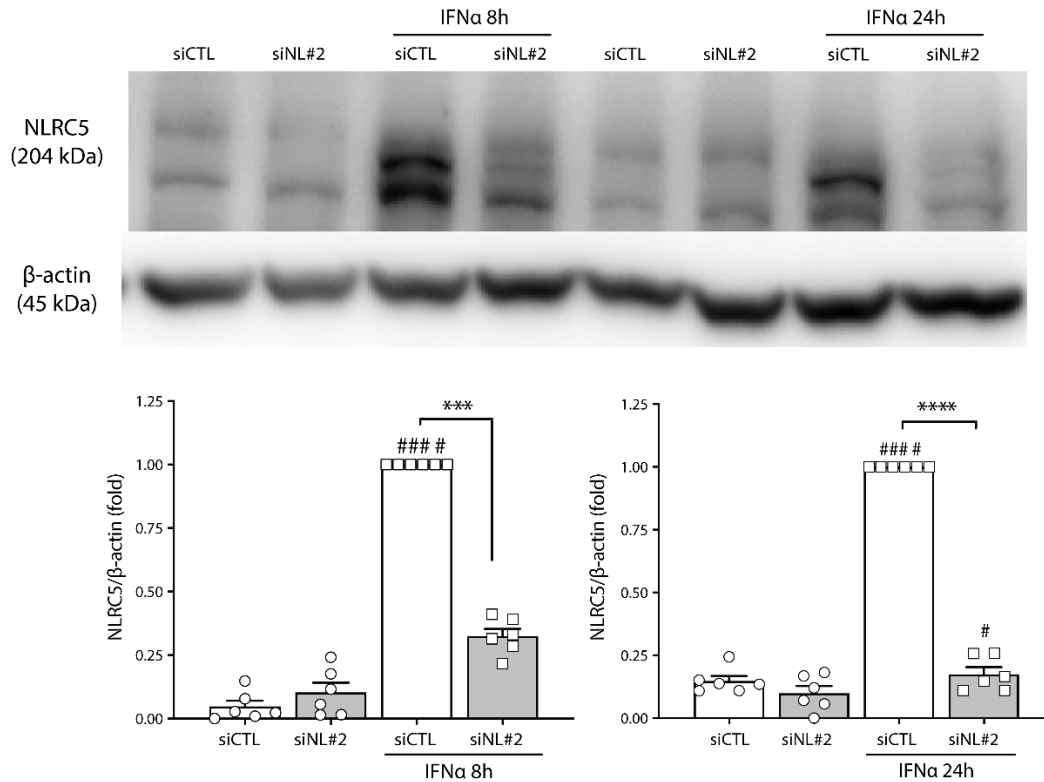

**Fig. S5. Validation of the NLRC5 depletion for the RNA-sequencing experiments.** EndoC- $\beta$ H1 were transfected with a siRNA control (siCTL, white bars) or with a siRNAs targeting *NLRC5* (siNL#2, grey bars). The cells were left untreated or treated with IFN $\alpha$  (2,000 U/mL) for 8h and 24h. The efficiency of NLRC5 depletion was confirmed at the protein level by western blotting in all samples ahead of RNA-seq analysis. A representative image of the western blotting is shown together with the respective NLRC5 protein quantification. NLRC5 protein was quantified by densitometry and normalized by the housekeeping protein  $\beta$ -actin and then by the highest value of each experiment considered as 1. Results are means  $\pm$  SEM of 6 independent experiments. # $P < 0.05$  and ##### $P < 0.0001$  vs untreated and transfected with the same siRNA; \*\*\* $P < 0.001$  and \*\*\*\* $P < 0.0001$  as indicated by bars (ANOVA followed by Bonferroni correction for multiple comparisons).



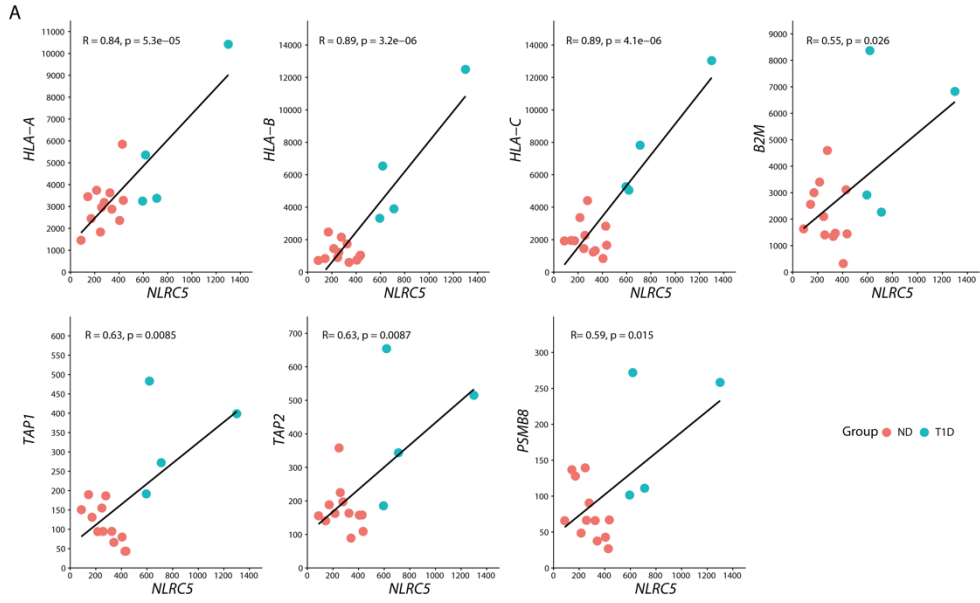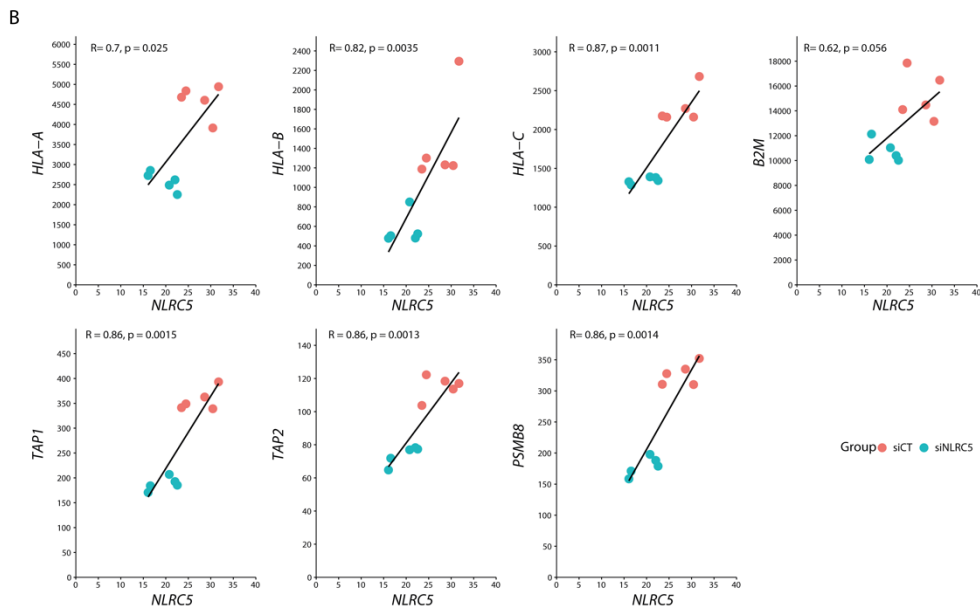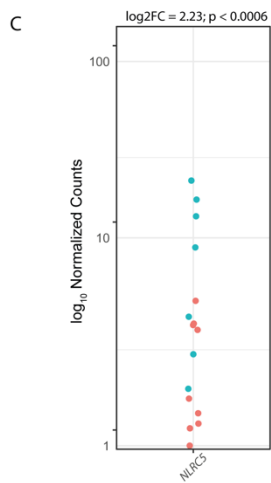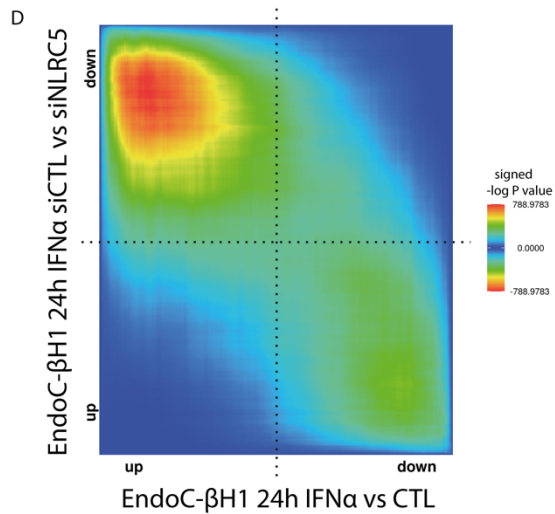

**Fig. S6. *NLRC5* expression is positively correlated with HLA Class I-related genes in  $\beta$ -cells from patients affected by T1D and in EndoC- $\beta$ H1 cells exposed to IFN $\alpha$ .** (A) Composed scatter plots showing the correlation between the expression of selected HLA class I-related genes and *NLRC5* in FACS-purified  $\beta$ -cells from donors with type 1 diabetes (T1D) or non-diabetic donors (ND). The linear correlation of the normalized counts (22) of selected genes and *NLRC5* was generated using Pearson's test. (B) Composed scatter plots showing the correlation between the expression of selected HLA class I-related genes and *NLRC5* in EndoC- $\beta$ H1 cells exposed to IFN $\alpha$  during 24h, with previous exposure to siNL#2 or siCTL. The linear correlation between the expression, measured by transcripts per million (TPM), of selected genes and *NLRC5*, was generated using Pearson's test. (C) Scatter plot showing the increase of *NLRC5* expression in  $\beta$ -cells from donors affected by T1D compared to ND donors. scRNA-seq data from T1D and ND donors was obtained via the HPAP (<https://hpap.pmacs.upenn.edu/>).  $\beta$ -cells were selected, and data was transformed into "pseudo-bulk". Differential gene expression analysis was then carried out as described in the Methods. (D) Rank-rank hypergeometric overlap analysis between EndoC- $\beta$ H1 exposed to IFN $\alpha$  during 24h vs control and EndoC- $\beta$ H1 exposed to IFN $\alpha$  during 24h following KD of *NLRC5* vs control. The level map colors display the adjusted log P values of the overlap (the P values were adjusted using the Benjamini and Yekutieli method) between genes up-regulated in both datasets (bottom left quadrant), down-regulated in both (top right quadrant), up-regulated in the left-hand dataset and down in the bottom part (top left quadrant), and down in the left-hand dataset and up-regulated in the bottom part dataset (bottom right quadrant).

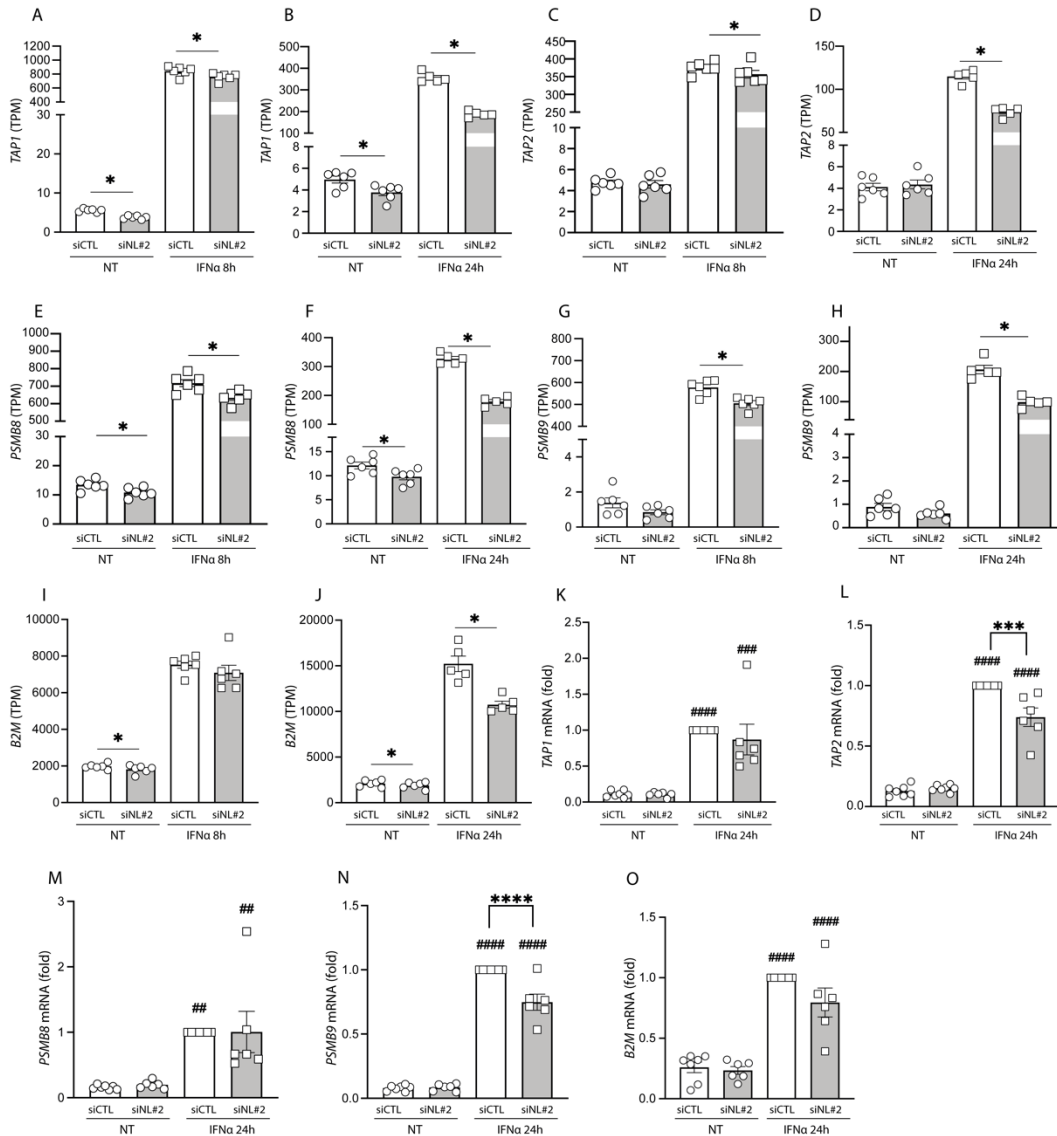

**Fig. S7. *NLRC5* depletion prevents the expression of IFN $\alpha$ -induced genes related to the antigen presentation machinery in EndoC- $\beta$ H1 and dispersed human islets. (A-J) RNA-seq analysis evidence that *NLRC5* decreases the mRNA expression levels of *TAP1* (A, B), *TAP2* (C, D), *PSMB8* (E, F), *PSMB9* (G, H), and *B2M* (I, J) at 8h and 24h. The mRNA expression levels are expressed as transcripts per million (TPM). (K-O) Dispersed human islets were transfected with siRNA control (siCTL, white bars) or with siRNAs targeting *NLRC5* (siNL#2, grey bars). The cells were left untreated or treated with IFN $\alpha$  (2,000 U/mL) for 24h. The mRNA expression level of *TAP1* (K), *TAP2* (L), *PSMB8* (M), *PSMB9* (N), and *B2M* (O) were evaluated by quantitative RT-PCR and normalized by geometric mean of *GAPDH* and  $\beta$ -*actin* and then by**

siCTL treated with IFN $\alpha$  considered as 1. Results are means  $\pm$  SEM of 6-7 independent experiments. ##P < 0.01, ###P < 0.001 and ####P < 0.0001 vs untreated and transfected with the same siRNA; \*\*\*P < 0.001 and \*\*\*\*P < 0.0001 as indicated by bars (ANOVA followed by Bonferroni correction for multiple comparisons).

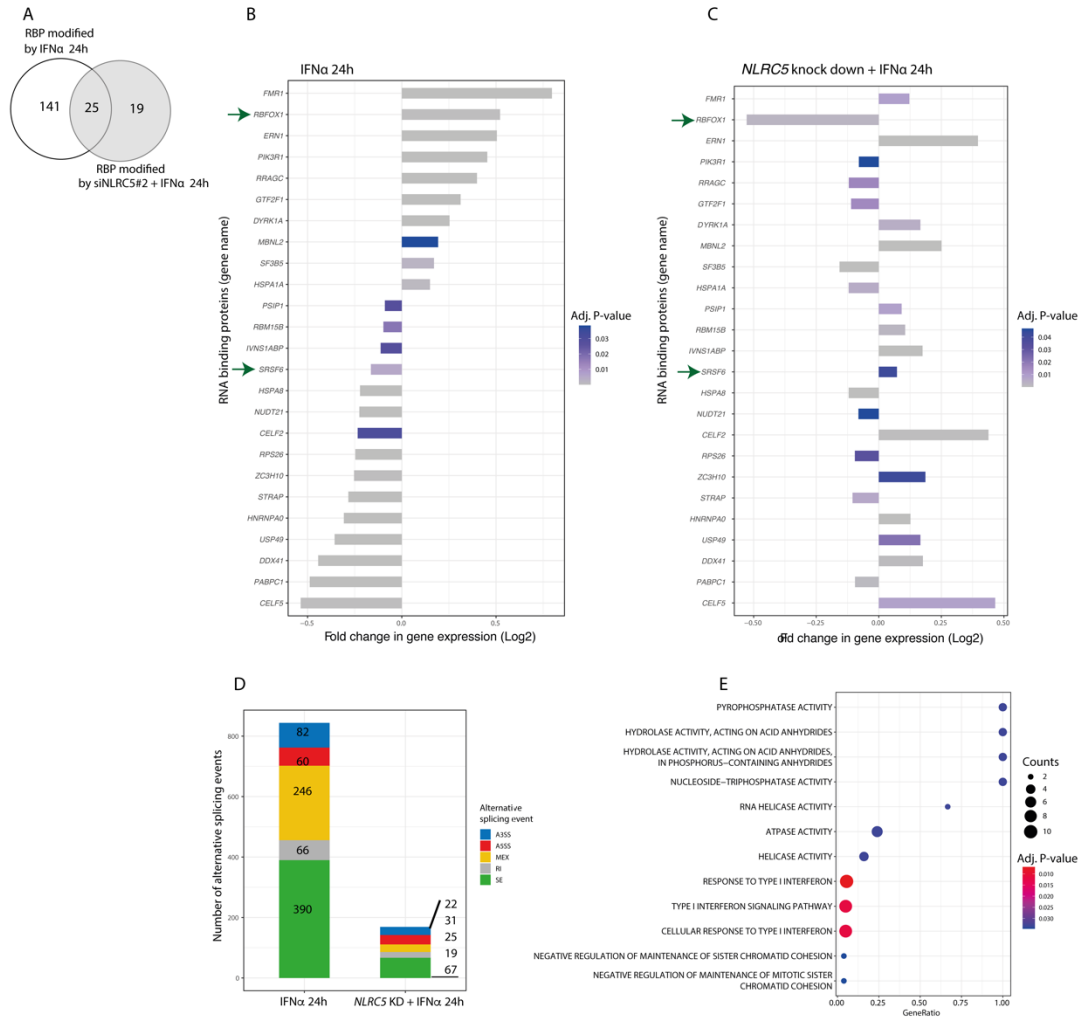

**Fig. S8. *NLRC5* depletion attenuates the impact of IFN $\alpha$ -induced alternative splicing modifications in EndoC- $\beta$ H1 cells at 24h.** (A) Venn diagram showing the overlap of the RNA binding proteins (RBPs) modified by the exposure to IFN $\alpha$  for 24h with or without previous *NLRC5* depletion. A total of 166 RBPs were modified by IFN $\alpha$ , and 44 RBPs were modified by *NLRC5* depletion followed by IFN $\alpha$  exposure. 25 RBPs were commonly regulated. (B-C) Distinct modifications on the mRNA expression level of RBP proteins in EndoC- $\beta$ H1 cells exposed to IFN $\alpha$  for 24h (B) or EndoC- $\beta$ H1 cells exposed to IFN $\alpha$  for 24h after *NLRC5* depletion (C). The bar charts depict log<sub>2</sub>-transformed fold-change of the 25 commonly regulated RBPs (Adjusted P value < 0.05). Arrows indicate particularly relevant RBPs that are modified by IFN $\alpha$  (B) but restored by *NLRC5* KD (C). (D) The number of the different alternative splicing events induced by IFN $\alpha$  after 24h exposure was markedly decreased after *NLRC5* depletion. EndoC- $\beta$ H1 cells

were exposed to IFN $\alpha$  for 24h, and to IFN $\alpha$  for 24h after *NLRC5* depletion (*NLRC5* KD). The number of the alternative splicing events are indicated in the respective dimension of the bar. A3ss, alternative 3' splice site; A5ss, alternative 5' splice site; MEX, mutually exclusive exons; RI, intron retention; SE, skipped exons. (E) Gene Ontology (GO) enrichment of the genes with modified alternative splicing events in EndoC- $\beta$ H1 treated with IFN $\alpha$  for 24h. Gene ratio refers to the percentage of total genes with alternative splicing modifications in the given GO term. Gene count refers to number of genes in the tested set that are associated with a given GO term (Adjusted P value < 0.05).

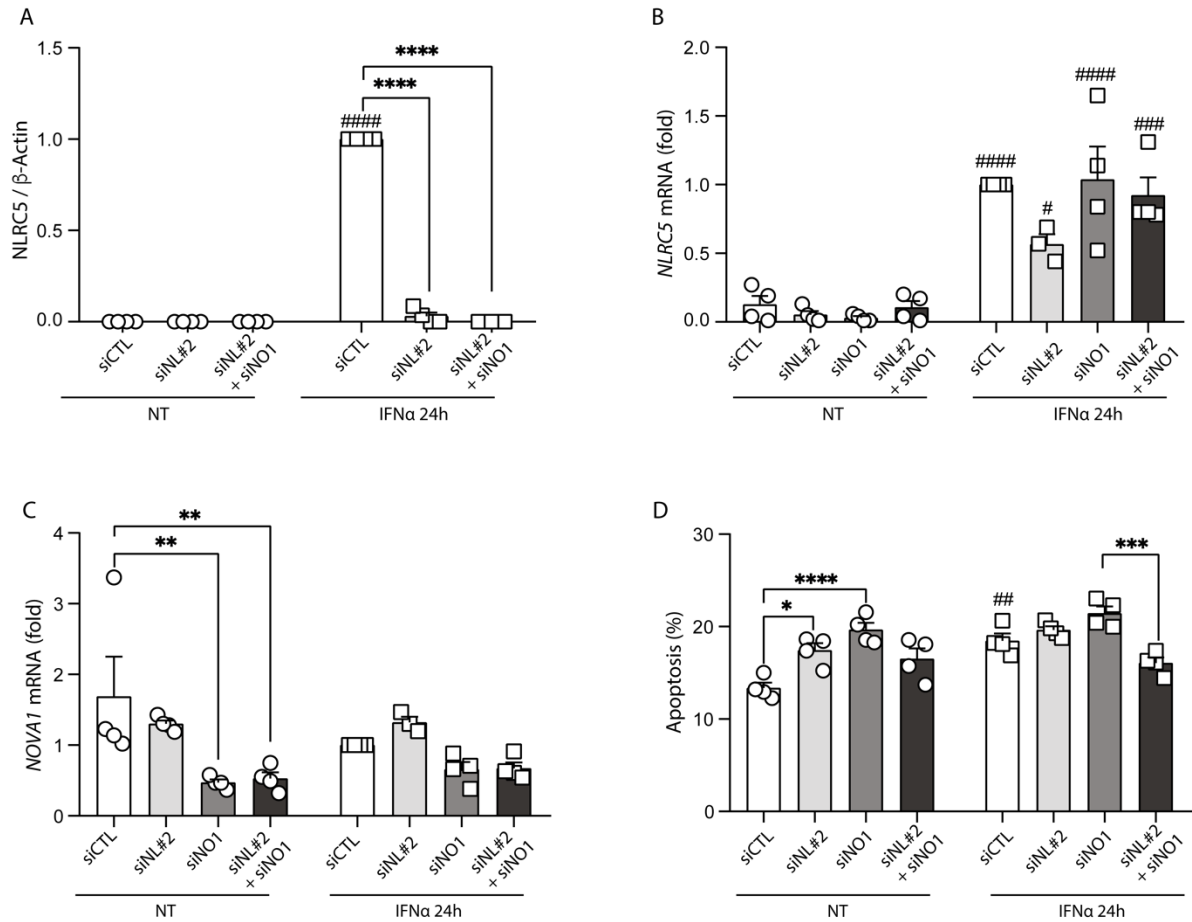

**Fig. S9. *NLRC5* depletion decreases cell death induced by siRNA-induced inhibition of *NOVA1*.** EndoC- $\beta$ H1 cells were transfected with: a siRNA control (siCTL, white bars); a siRNA targeting *NLRC5* (siNL#2, light-grey bars); a siRNA targeting *NOVA1* (siNo1, dark-grey bars); or with the combination of both siRNA targeting *NLRC5* and *NOVA1* (siNL#2+siNo1, black bars). Cells were left untreated or treated with IFN $\alpha$  (2000 U/mL) for 24h. **(A)** *NLRC5* protein expression was determined by western blotting and quantified by densitometry and normalized by the housekeeping protein  $\beta$ -actin and then by the highest value of each experiment considered as 1. **(B)** *NLRC5* and **(C)** *NOVA1* mRNA expression was measured by quantitative RT-PCR and normalized by the geometric mean of *GAPDH* and  $\beta$ -actin and then by siCTL treated with IFN $\alpha$  considered as 1. **(D)** The percentage of dead cells was counted by Hoechst and propidium iodine staining. Results are means  $\pm$  SEM of 3-4 independent experiments. #P < 0.05, ##P < 0.01, ###P < 0.001 and ####P < 0.0001 vs untreated cells transfected with the same siRNA; \*P < 0.05, \*\*P < 0.01,

\*\*\*P < 0.001 \*\*\*\*P < 0.0001, as indicated by bars (ANOVA followed by Bonferroni correction for multiple comparisons).



**A**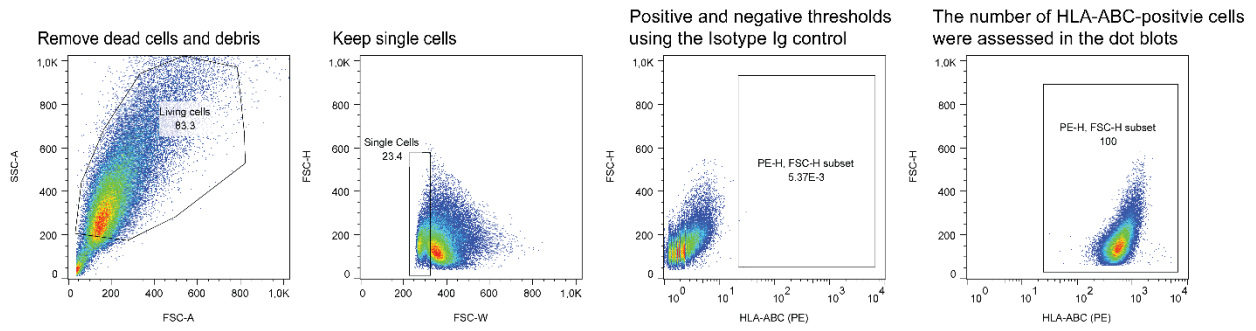**B**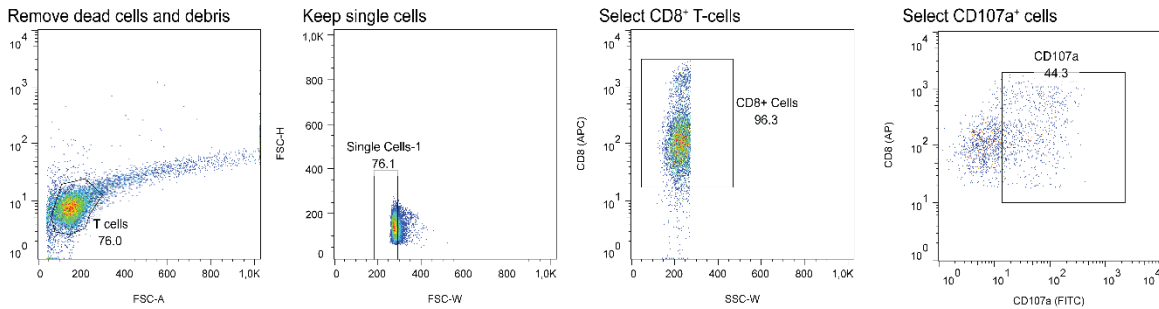

**Fig. S10. Gating strategy used to evaluate HLA-ABC expression and CD107a<sup>+</sup> T-cells.** The cells were first identified based on forward scatter (FSC) and side scatter (SSC) parameters to exclude cell debris and non-viable cells. Next, the relation between forward scatter width (FSC-W) and forward scatter height (FSC-H) was used to eliminate cell doublets. **(A)** The number of HLA-ABC-positive cells were assessed in the dot blots. Positive and negative thresholds were set using an isotype Ig control with the same fluorophore. **(B)** The CD8<sup>+</sup> cells were selected first to allow next to calculate the percentage of CD107a<sup>+</sup>.

| <b>Donor ID</b> | <b>Age (years)</b> | <b>Sex</b> | <b>BMI</b> | <b>Clinical Diagnosis</b> | <b>Cause of death</b>      |
|-----------------|--------------------|------------|------------|---------------------------|----------------------------|
| HPAP-020        | 14                 | M          | 13.2       | Recent T1DM Unsuspected   | Cardiovascular             |
| HPAP-021        | 13                 | F          | 21.4       | T1DM                      | Cardiovascular<br>DKA/IDDM |
| HPAP-023        | 17                 | F          | 21.35      | T1DM                      | IDDM/DKA                   |
| HPAP-024        | 18                 | M          | 24.3       | T1D control               | Blunt Injury<br>(MVA)      |
| HPAP-026        | 24                 | M          | 20.8       | T1D control               | Drug<br>Intoxication       |
| HPAP-027        | 31                 | F          | 32.71      | T1D control               | Cardiovascular             |
| HPAP-028        | 4                  | M          | 17.3       | T1DM                      | Cerebral<br>Edema (DKA)    |
| HPAP-032        | 10                 | F          | 16.3       | T1DM                      | Cardiovascular             |
| HPAP-034        | 13                 | M          | 18.6       | T1D control               | GSW                        |
| HPAP-035        | 35                 | M          | 26.91      | T1D control               | Seizure                    |
| HPAP-036        | 23                 | F          | 16         | T1D control               | Blunt Injury<br>(Homicide) |
| HPAP-037        | 35                 | F          | 21.9       | T1D control               | Intracranial<br>Hemorrhage |
| HPAP-055        | 24                 | M          | 27.9       | T1DM                      | Cardiovascular<br>DKA      |
| HPAP-056        | 33                 | M          | 32.89      | T1D control               | Cardiovascular             |
| HPAP-063        | 45                 | F          | 38.41      | T2D control               | Natural Causes             |
| HPAP-064        | 24                 | M          | 16.98      | T1DM                      | Anoxia                     |
| HPAP-071        | 12                 | F          | 15.42      | T1DM                      | Asphyxiation/S<br>uicide   |
| HPAP-072        | 19                 | M          | 23.1       | T1D control               | Drug<br>Intoxication       |
| HPAP-074        | 40                 | F          | 36.88      | T2D control               | Drug<br>Intoxication       |
| HPAP-075        | 35                 | M          | 27.52      | T2D control               | Drug<br>Intoxication       |
| HPAP-077        | 47                 | M          | 32.78      | T2D control               | Cardiovascular             |
| HPAP-082        | 25                 | M          | 23.96      | T1D control               | Blunt injury               |

**Table S1: Characteristics of the pancreas donors studied in the HPAP project (<https://hpap.pmacs.upenn.edu/>) and included in the present study. M, Male; F, Female.**

|          | <b>Age<br/>(years)</b> | <b>Sex</b> | <b>BMI<br/>(kg/m<sup>2</sup>)</b> | <b>Cause of death</b>     | <b>β-cell purity<br/>(%)</b> |
|----------|------------------------|------------|-----------------------------------|---------------------------|------------------------------|
| Donor 1  | 74                     | M          | 33                                | Cardiovascular disease    | 21                           |
| Donor 2  | 76                     | M          | 28.4                              | Cardiovascular disease    | 43                           |
| Donor 3  | 83                     | M          | 25.7                              | Cardiovascular disease    | 37                           |
| Donor 4  | 86                     | F          | 27.1                              | Cardiovascular disease    | 33                           |
| Donor 5  | 62                     | F          | 23.5                              | Cardiovascular disease    | 56                           |
| Donor 6  | 63                     | M          | 29.4                              | Cardiovascular disease    | 36                           |
| Donor 7  | 76                     | F          | 23.9                              | Cardiovascular disease    | 36                           |
| Donor 8  | 60                     | F          | 23.4                              | Postanoxic encephalopathy | 24                           |
| Donor 9  | 76                     | M          | 26.6                              | Stroke                    | 63                           |
| Donor 10 | 67                     | M          | 25.7                              | Trauma                    | 48                           |
| Donor 11 | 82                     | M          | 22.5                              | Trauma                    | 70                           |
| Donor 12 | 63                     | F          | 27.3                              | Stroke                    | 58                           |
| Donor 13 | 74                     | M          | 26                                | Cerebral hemorrhage       | 46                           |
| Donor 14 | 73                     | M          | 24.1                              | Cerebral hemorrhage       | 11                           |
| Donor 15 | 71                     | F          | 31.2                              | Cerebral hemorrhage       | 46                           |
| Donor 16 | 72                     | F          | 22.9                              | Cardiovascular disease    | 45                           |
| Donor 17 | 66                     | F          | 26.4                              | Trauma                    | 45                           |

**Table S2. Characteristics of the human islet donors.** M, Male; F, Female; β-cell purity was determined by insulin staining, as described in (62).

| Target                                                       | Catalog number | Company                 | Application | Dilution              | Incubation time (h) | Temperature (°C) |
|--------------------------------------------------------------|----------------|-------------------------|-------------|-----------------------|---------------------|------------------|
| NLRC5                                                        | MABF260        | Sigma-Aldrich           | WB          | 1:500                 | overnight           | 4°C              |
| β-Actin                                                      | 4967           | Cell signaling          | WB          | 1:5000                | overnight           | 4°C              |
| Horse raddish peroxidase-conjugated anti rabbit              | 711-036-152    | Jackson Immuno Research | WB          | 1:10000               | 1 h                 | Room temperature |
| Horse raddish peroxidase-conjugated anti rat                 | 112-035-003    | Jackson Immuno Research | WB          | 1:10000               | 1 h                 | Room temperature |
| HLA-ABC PE conjugated                                        | 560964         | BD Biosciences          | FC          | 1:50                  | 30 min              | 4°C              |
| PE Mouse IgG1 κ Isotype control                              | 555749         | BD Biosciences          | FC          | 1:50                  | 30 min              | 4°C              |
| CD107a (LAMP-1), FITC                                        | 11-1079-42     | ThermoFisher Scientific | FC          | 1:50                  | 4h                  | 37°C             |
| CD107a (LAMP-1), FITC                                        | 11-1079-42     | ThermoFisher Scientific | FC          | 1:50                  | 4h                  | 37°C             |
| Insulin                                                      | IR002          | Dako (Agilent)          | ICC         | Ready to use solution | 18 h                | 4°C              |
| Glucagon                                                     | G2654          | Sigma-Aldrich           | ICC         | 1:1000                | 18 h                | 4°C              |
| Somatostatin                                                 | ab108456       | Abcam                   | ICC         | 1:1000                | 18 h                | 4°C              |
| Alexa Fluor 488 AffiniPure Donkey Anti-Guinea Pig IgG (H+L)  | 706-545-148    | Jackson Immuno Research | ICC         | 1 :500                | 1 h                 | Room temperature |
| Rhodamine Red-X (RRX) AffiniPure Donkey Anti-Mouse IgG (H+L) | 715-295-151    | Jackson Immuno Research | ICC         | 1 :500                | 1 h                 | Room temperature |
| Alexa Fluor 647 AffiniPure Donkey Anti-Rabbit IgG (H+L)      | 711-605-152    | Jackson Immuno Research | ICC         | 1 :500                | 1 h                 | Room temperature |

**Table S3. Antibodies.** The table provides information on the antibodies used in this study, including protein target name, company, catalog number, application, dilution, incubation and temperature time. WB Western blotting, FC Flow cytometry, ICC Immunofluorescence.

| Gene    | Primer sequence (5' -> 3')                | Direction | Application | Supplier   |
|---------|-------------------------------------------|-----------|-------------|------------|
| ACTB    | CTGTACGCCAACACAGTGCT                      | Forward   | qRT-PCR     | Eurogentec |
|         | GCTCAGGAGGAGCAATGATC                      | Reverse   | qRT-PCR     | Eurogentec |
| ATF3    | GTAGCCCCTGAAGAAGATGAAAG                   | Forward   | qRT-PCR     | Eurogentec |
|         | CTTCTCCGACTCTTTCTG                        | Reverse   | qRT-PCR     | Eurogentec |
| BiP     | Qiagen QuantiTect primer, cat# QT00096404 |           | qRT-PCR     | Qiagen     |
|         |                                           |           | qRT-PCR     | Qiagen     |
| B2M     | TGCTGTCTCCATGTTTGATGTA                    | Forward   | qRT-PCR     | Eurogentec |
|         | GACCAAGATGTTGATGTTGGATAAG                 | Reverse   | qRT-PCR     | Eurogentec |
| CXCL10  | GTGGCATTCAAGGAGTACCTC                     | Forward   | qRT-PCR     | Eurogentec |
|         | GCCTTCGATTCTGGATTGAG                      | Reverse   | qRT-PCR     | Eurogentec |
| GAPDH   | CAGCCTCAAGATCATCAGCA                      | Forward   | qRT-PCR     | Eurogentec |
|         | TGTGGTCATGAGTCCTTCCA                      | Reverse   | qRT-PCR     | Eurogentec |
| HLA-ABC | GAGAACGGGAAGGAGACGC                       | Forward   | qRT-PCR     | Eurogentec |
|         | CATCTCAGGGTGAGGGGCT                       | Reverse   | qRT-PCR     | Eurogentec |
| HLA-E   | TGGTTGCTGCTGTGATATGGA                     | Forward   | qRT-PCR     | Eurogentec |
|         | GCTCCACTCAGCCTTAGAGT                      | Reverse   | qRT-PCR     | Eurogentec |
| HNRNPLL | GACATGATGGCTATGGATCC                      | Forward   | qRT-PCR     | Eurogentec |
|         | CAGAGGGATTTCTCCATG                        | Reverse   | qRT-PCR     | Eurogentec |
| IRF1    | CATTCACACAGGCCGATACA                      | Forward   | qRT-PCR     | Eurogentec |
|         | TGGTCTTTCACCTCCTCGATAT                    | Reverse   | qRT-PCR     | Eurogentec |
| IRF9    | CTCTTCAGAACCGCCTACTTC                     | Forward   | qRT-PCR     | Eurogentec |
|         | GGCTCTCTTCCAGAAATTCA                      | Reverse   | qRT-PCR     | Eurogentec |
| MBNL2   | CTGACAAACTGGAGGTATGC                      | Forward   | qRT-PCR     | Eurogentec |
|         | TGTCGATCATGGTGCTGTC                       | Reverse   | qRT-PCR     | Eurogentec |
| MDA5    | GAGGAATCAGCACGAGGAATAA                    | Forward   | qRT-PCR     | Eurogentec |
|         | TCAGATGGTGGGCTTTGAC                       | Reverse   | qRT-PCR     | Eurogentec |
| MX1     | AGACAGGACCATCGGAATCT                      | Forward   | qRT-PCR     | Eurogentec |
|         | GTAACCCTTCTTCAGGTGGAAC                    | Reverse   | qRT-PCR     | Eurogentec |
| NLRC5   | GTGCTGTGGCAGGTTTACA                       | Forward   | qRT-PCR     | Eurogentec |
|         | GCTGAGGTCTTTACACTTGCTCA                   | Reverse   | qRT-PCR     | Eurogentec |
| NOVA1   | CCGGTAGCAGGGGCAGGAAC                      | Forward   | qRT-PCR     | Eurogentec |
|         | AGCGGCCTTTTCCGCGAGTC                      | Reverse   | qRT-PCR     | Eurogentec |
| NOVA2   | CCATCAAGCTCTCCAAGTCC                      | Forward   | qRT-PCR     | Eurogentec |
|         | GGGATTTCTCGGACCTTCTC                      | Reverse   | qRT-PCR     | Eurogentec |
| PDL1    | CCAGTCACCTCTGAACATGAA                     | Forward   | qRT-PCR     | Eurogentec |
|         | ACTTGATGGTCACTGCTTGT                      | Reverse   | qRT-PCR     | Eurogentec |
| PSMB8   | CTACTAGATGTATGCGGAGCCC                    | Forward   | qRT-PCR     | Eurogentec |
|         | CAATCACTCCATGCTGGAAGTTG                   | Reverse   | qRT-PCR     | Eurogentec |
| PSMB9   | CATCTACTGTGCACTCTCTGGTT                   | Forward   | qRT-PCR     | Eurogentec |
|         | AGGTTCTCTCCAGTTCTATCCCAT                  | Reverse   | qRT-PCR     | Eurogentec |
| SOCS1   | GACGCCTGCGGATTCTAC                        | Forward   | qRT-PCR     | Eurogentec |
|         | GAGGCCATCTTCACGCTAA                       | Reverse   | qRT-PCR     | Eurogentec |
| STAT1   | GACCCAATCCAGATGTCTATGA                    | Forward   | qRT-PCR     | Eurogentec |
|         | CCCGACTGAGCCTGATTA                        | Reverse   | qRT-PCR     | Eurogentec |
| STAT2   | GTTGGCAGTTCTCCTCCTATG                     | Forward   | qRT-PCR     | Eurogentec |
|         | GAAGTCAGCCCAGGACAATAA                     | Reverse   | qRT-PCR     | Eurogentec |
| TAP1    | TCCAACAGAACCAGACAGGTAAC                   | Forward   | qRT-PCR     | Eurogentec |
|         | CACCAGGTACCACAGAAATAAGC                   | Reverse   | qRT-PCR     | Eurogentec |

|       |                          |         |          |            |
|-------|--------------------------|---------|----------|------------|
| TAP2  | CTGCACAGCCAGGTGGTTTC     | Forward | qRT-PCR  | Eurogentec |
|       | CAATGTTGTTTCCTCACAGAACCG | Reverse | qRT-PCR  | Eurogentec |
| USP18 | CAATCCACCTCATGCGATTCT    | Forward | qRT-PCR  | Eurogentec |
|       | TTGGAAGGATCTGGCTGAAATC   | Reverse | qRT-PCR  | Eurogentec |
| STAT1 | GATCCTGCGCGCAGAAAAG      | Forward | Splicing | Eurogentec |
|       | AGTTCGTACCACTGAGAC       | Reverse | Splicing | Eurogentec |
| STAT2 | GGAAAGGGCAGCAATAAGGGG    | Forward | Splicing | Eurogentec |
|       | GAAGTCCAACTGAGAGCAGG     | Reverse | Splicing | Eurogentec |
| HLA-F | CATCCTGAGATGGGAGCAG      | Forward | Splicing | Eurogentec |
|       | GACACTGTGACTCCGGAG       | Reverse | Splicing | Eurogentec |

**Table S4. Sequences of the primers used for quantitative RT-PCR and alternative splicing analysis in the present study**

**Data S1. (See supplementary\_table\_01.xlsx):** Results from the Differential Gene Expression (DGE) analysis performed using MAST (81) of each identified cell type in Human iPSC-derived  $\beta$ -like cells exposed or not to IFN $\alpha$  during 24h in the scRNA-sequencing dataset.

**Data S2. (See supplementary\_table\_02.xlsx):** Results from the GSEA analysis of each identified cell type in human iPSC-derived  $\beta$ -like cells exposed or not to IFN $\alpha$  during 24h in the scRNA-seq dataset. KEGG (90) and REACTOME (91) were used as reference databases.

**Data S3. (See supplementary\_table\_03.xlsx):** RNA-seq differential expression analysis and GSEA analysis using KEGG (90) and REACTOME (91) of bulk RNA-seq of EndoC- $\beta$ H1 exposed to siCTL (control) or siNLRC5 and then treated with IFN $\alpha$  for 8 or 24h with as reference databases (6 sheets). Each experiment has one sheet for differential gene expression analysis and two separate sheets for the results from the fGSEA analysis.
